# Supplementary material for: Artemisinin Targets Transcription Factor PDR1 and Impairs Candida glabrata Mitochondrial Function
Source: MDPI journal article supplement (doi:10.3390/antiox11101855), 2022-09-20
Supplement: s1 [file s1]

## Supplementary Materials

### **Artemisinin targets transcription factor PDR1 and impairs *Candida glabrata* mitochondrial function**

Pan Zhu<sup>1,2</sup>, Chaoping Yue<sup>3</sup>, Xin Zeng<sup>3</sup> and Xiulai Chen<sup>1</sup>

<sup>1</sup>State Key Laboratory of Food Science and Technology, Jiangnan University, Wuxi 214122, China

<sup>2</sup>State Key Laboratory of Membrane Biology, School of Life Sciences, Tsinghua University, Beijing 100084, China

<sup>3</sup>Anhui Province Key Laboratory of Pollutant Sensitive Materials and Environmental Remediation, Huaibei Normal University, Huaibei 235000, China

Correspondence:

Xiulai Chen, State Key Laboratory of Food Science and Technology, Jiangnan University, Wuxi 214122, China. Email: xlchen@jiangnan.edu.cn

**Table S1.** *C. glabrata* strains in this study.

| Stains                       | Genotype                                                         | Reference  |
|------------------------------|------------------------------------------------------------------|------------|
| <i>C. glabrata</i> ATCC 2001 | Wild type                                                        | [1]        |
| <i>C. glabrata</i> ATCC 55   | <i>his3Δ trp1Δ ura3Δ</i>                                         | [2]        |
| <i>Ndi1</i> KO               | <i>his3Δ trp1Δ ura3Δ ndi1::His3</i>                              | This study |
| PDR1 <sup>R376W</sup>        | <i>his3Δ trp1Δ ura3Δ pdr1::His3 (pY14-PDR1<sup>R376W</sup>)</i>  | This study |
| PDR1 <sup>Y584C</sup>        | <i>his3Δ trp1Δ ura3Δ pdr1::His3 (pY14-PDR1<sup>Y584C</sup>)</i>  | This study |
| PDR1 <sup>P822L</sup>        | <i>his3Δ trp1Δ ura3Δ pdr1::His3 (pY14-PDR1<sup>P822L</sup>)</i>  | This study |
| PDR1 <sup>D1082G</sup>       | <i>his3Δ trp1Δ ura3Δ pdr1::His3 (pY14-PDR1<sup>D1082G</sup>)</i> | This study |

**Table S2.** qPCR primers used in this study.

| Primers                | Sequence               |
|------------------------|------------------------|
| ACTIN qPCR-F           | ACCGCTGCTCAATCTTCC     |
| ACTIN qPCR-R           | TCCTTACGAACATCAACATCAC |
| ERG1 qPCR-F            | ACGATGTTGTCCTATTGAT    |
| ERG1 qPCR-R            | CGAAGTGGTAATCTAGCA     |
| ERG3 qPCR-F            | CTTCGGTCTGCTATTGTA     |
| ERG3 qPCR-R            | ACATCTGGTTCTTCAAGTA    |
| ERG9 qPCR-F            | GACCAACATTATCAGAGA     |
| ERG9 qPCR-R            | CTTCGTAGCATATTCAGA     |
| ERG11 qPCR-F           | TATGGTCGCCTTG CCATT    |
| ERG11 qPCR-R           | GACCCATGGGATCCAGTAGA   |
| ACS1 qPCR-F            | GTGTCGACAGACACGCTTTG   |
| ACS1 qPCR-R            | GAGAAACCTGCGAAGACGAC   |
| ACS2 qPCR-F            | CGCTGTGGTTGGTATCAATG   |
| ACS2 qPCR-R            | AGCGAATGGACCAATTTAC    |
| PDH E1 $\alpha$ qPCR-F | CTCCAACCAAGGTCAGGTGT   |
| PDH E1 $\alpha$ qPCR-R | AGCTTGGTAGACAGCCAGGA   |
| PDH E1 $\beta$ qPCR-F  | AACTTGCGTTCCATCAGACC   |
| PDH E1 $\beta$ qPCR-R  | GCACCGGTGACTCTTTGAAT   |
| PDH E2 qPCR-F          | GGATGCTGGTGGATCTCAGT   |
| PDH E2 qPCR-R          | CTTCTCGACATCGGCCTTAG   |
| PDH E3 qPCR-F          | CCGTTATCGGTGGTGGTATC   |
| PDH E3 qPCR-R          | TCGGCAGAGACGACCTTAGT   |
| NDI1 qPCR-F            | CCTATGCTCAATCTGTCTT    |
| NDI1 qPCR-R            | GAATGGTCTCCTCTGTAAC    |
| NDE1 qPCR-F            | CCTACATTGGCTCTGAAC     |
| NDE1 qPCR-R            | TGACATACACATTGCTAAGT   |

## References

- Gregori, C.; Schüller, C.; Roetzer, A.; Schwarzmüller, T.; Ammerer, G.; Kuchler, K., The high-osmolarity glycerol response pathway in the human fungal pathogen *Candida glabrata* strain ATCC 2001 lacks a signaling branch that operates in baker's yeast. *Eukaryotic cell* **2007**, 6, (9), 1635-45.

2. Roetzer, A.; Gregori, C.; Jennings, A. M.; Quintin, J.; Ferrandon, D.; Butler, G.; Kuchler, K.; Ammerer, G.; Schuller, C., *Candida glabrata* environmental stress response involves *Saccharomyces cerevisiae* Msn2/4 orthologous transcription factors. *Mol Microbiol* **2008**, 69, (3), 603-20.
